# Supplementary material for: Mesenteric Lymph Duct Ligation Alleviates Acute Lung Injury Caused by Severe Acute Pancreatitis Through Inhibition of High Mobility Group Box 1-Induced Inflammation in Rats
Source: Springer Nature journal article supplement (doi:10.1007/s10620-020-06801-6), 2021-01-12
Supplement: MOESM1 [file 18761898]

Figure S1 Impacts of MLDL on intestinal mucosa. Images of intestinal tissues H&E staining of control and MLDL rats (200× magnifications).
